# Supplementary material
Source: publisher site journal article supplement (https://www.dovepress.com/article/567559)

Table S1 Potential Risk Factors for Antibiotic Replacement Before PSM

| Variables      | Univariate analysis |      |      |       |                    | Multivariate analysis |      |      |       |                    |
|----------------|---------------------|------|------|-------|--------------------|-----------------------|------|------|-------|--------------------|
|                | $\beta$             | S.E  | t    | P     | $\beta$ (95%CI)    | $\beta$               | S.E  | t    | P     | $\beta$ (95%CI)    |
| Group          |                     |      |      |       |                    |                       |      |      |       |                    |
| Single group   |                     |      |      |       | 0.00 (Reference)   |                       |      |      |       | 0.00 (Reference)   |
| Multiple group | 0.47                | 0.26 | 1.80 | 0.072 | 1.60 (0.96 ~ 2.66) | 0.47                  | 0.26 | 1.77 | 0.076 | 1.59 (0.95 ~ 2.66) |
| Age            | 0.02                | 0.01 | 2.16 | 0.030 | 1.02 (1.01 ~ 1.03) | 0.02                  | 0.01 | 2.14 | 0.032 | 1.02 (1.01 ~ 1.03) |

Abbreviations:  $\beta$ , Beta Coefficient; S.E, Standard Error; t, T-Statistic; P, P-Value; CI, Confidence Interval.

Table S2 Potential Risk Factors for Antibiotic Replacement Following PSM

| Variables      | Univariate analysis |      |       |       |                    | Multivariate analysis |      |       |       |                    |
|----------------|---------------------|------|-------|-------|--------------------|-----------------------|------|-------|-------|--------------------|
|                | $\beta$             | S.E  | t     | P     | $\beta$ (95%CI)    | $\beta$               | S.E  | t     | P     | $\beta$ (95%CI)    |
| Group          |                     |      |       |       |                    |                       |      |       |       |                    |
| Single group   |                     |      |       |       | 0.00 (Reference)   |                       |      |       |       | 0.00 (Reference)   |
| Multiple group | 0.48                | 0.24 | 1.99  | 0.046 | 1.61 (1.01 ~ 2.58) | 0.48                  | 0.24 | 1.98  | 0.048 | 1.61 (1.01 ~ 2.59) |
| Gender         | -0.61               | 0.28 | -2.19 | 0.028 | 0.54 (0.31 ~ 0.94) | -0.61                 | 0.28 | -2.18 | 0.029 | 0.54 (0.31 ~ 0.94) |

Abbreviations:  $\beta$ , Beta Coefficient; S.E, Standard Error; t, T-Statistic; P, P-Value; CI, Confidence Interval.

Table S3 Potential risk variables for mechanical ventilation duration before PSM

| Variables      | Univariate analysis |       |       |       |                            | Multivariate analysis |       |       |       |                            |
|----------------|---------------------|-------|-------|-------|----------------------------|-----------------------|-------|-------|-------|----------------------------|
|                | $\beta$             | S.E   | t     | P     | $\beta$ (95%CI)            | $\beta$               | S.E   | t     | P     | $\beta$ (95%CI)            |
| Group          |                     |       |       |       |                            |                       |       |       |       |                            |
| Single group   |                     |       |       |       | 0.00<br>(Reference)        |                       |       |       |       | 0.00<br>(Reference)        |
| Multiple group | 122.34              | 30.36 | 4.03  | <.001 | 122.34<br>(62.83 ~ 181.85) | 119.73                | 29.57 | 4.05  | <.001 | 119.73<br>(61.77 ~ 177.69) |
| Gender         |                     |       |       |       |                            |                       |       |       |       |                            |
| Female         |                     |       |       |       | 0.00<br>(Reference)        |                       |       |       |       | 0.00<br>(Reference)        |
| Male           | -83.96              | 33.78 | -2.49 | 0.013 | -83.96 (-150.17 ~ -17.75)  | -80.06                | 32.32 | -2.48 | 0.014 | -80.06 (-143.41 ~ -16.72)  |
| CHS            |                     |       |       |       |                            |                       |       |       |       |                            |
| NO             |                     |       |       |       | 0.00<br>(Reference)        |                       |       |       |       | 0.00<br>(Reference)        |
| YES            | 117.04              | 53.20 | 2.20  | 0.028 | 117.04<br>(12.77 ~ 221.31) | 86.78                 | 52.77 | 1.64  | 0.101 | 86.78 (-16.65 ~ 190.21)    |

| Variables        | Univariate analysis |      |       |       |                       | Multivariate analysis |      |       |       |                       |
|------------------|---------------------|------|-------|-------|-----------------------|-----------------------|------|-------|-------|-----------------------|
|                  | $\beta$             | S.E  | t     | P     | $\beta$ (95%CI)       | $\beta$               | S.E  | t     | P     | $\beta$ (95%CI)       |
| Respiratory rate | 6.36                | 1.85 | 3.44  | <.001 | 6.36 (2.73 ~ 9.98)    | 3.74                  | 2.00 | 1.87  | 0.062 | 3.74 (-0.18 ~ 7.66)   |
| Heart rate       | 1.45                | 0.39 | 3.72  | <.001 | 1.45 (0.68 ~ 2.21)    | 0.73                  | 0.43 | 1.70  | 0.090 | 0.73 (-0.11 ~ 1.56)   |
| MAP              | -1.17               | 0.48 | -2.45 | 0.015 | -1.17 (-2.11 ~ -0.24) | -1.10                 | 0.46 | -2.38 | 0.018 | -1.10 (-2.01 ~ -0.20) |
| APACHE II        | 7.39                | 2.44 | 3.03  | 0.003 | 7.39 (2.61 ~ 12.18)   | 1.92                  | 2.58 | 0.74  | 0.458 | 1.92 (-3.14 ~ 6.98)   |

*Abbreviations: CHS, Chronic Health Score; MAP, Mean Arterial Pressure; APACHE II, Acute Physiology and Chronic Health Evaluation II;  $\beta$ , Beta Coefficient; S.E, Standard Error; t, T-Statistic; P, P-Value; CI, Confidence Interval.*

Table S4 Potential risk variables for length of hospital stay before PSM

| Variables      | Univariate analysis |       |       |       |                          | Multivariate analysis |       |       |       |                         |
|----------------|---------------------|-------|-------|-------|--------------------------|-----------------------|-------|-------|-------|-------------------------|
|                | $\beta$             | S.E   | t     | P     | $\beta$ (95%CI)          | $\beta$               | S.E   | t     | P     | $\beta$ (95%CI)         |
| Group          |                     |       |       |       |                          |                       |       |       |       |                         |
| Single group   |                     |       |       |       | 0.00 (Reference)         |                       |       |       |       | 0.00 (Reference)        |
| Multiple group | 5.96                | 2.78  | 2.15  | 0.033 | 5.96 (0.51 ~ 11.40)      | 6.41                  | 2.69  | 2.38  | 0.018 | 6.41 (1.14 ~ 11.68)     |
| HCT            | -44.43              | 16.06 | -2.77 | 0.006 | 1.18 (0.54 ~ 1.82)       | -38.03                | 16.13 | -2.36 | 0.019 | -38.03 (-69.64 ~ -6.41) |
| PH             | -32.75              | 10.19 | -3.22 | 0.001 | -36.28 (-66.94 ~ -5.61)  | -28.07                | 10.32 | -2.72 | 0.007 | -28.07 (-48.29 ~ -7.84) |
| Heart rate     | 0.09                | 0.04  | 2.44  | 0.015 | -33.07 (-52.39 ~ -13.74) | 0.04                  | 0.04  | 1.10  | 0.274 | 0.04 (-0.03 ~ 0.11)     |
| MAP            | -0.11               | 0.04  | -2.56 | 0.011 | 0.09 (0.02 ~ 0.16)       | -0.07                 | 0.04  | -1.65 | 0.100 | -0.07 (-0.16 ~ 0.01)    |
| GCS            | 1.18                | 0.33  | 3.62  | <.001 | -0.11 (-0.19 ~ -0.03)    | 1.08                  | 0.32  | 3.41  | <.001 | 1.08 (0.46 ~ 1.70)      |

*Abbreviations: HCT, Hematocrit; PH, Potential of Hydrogen; MAP, Mean Arterial Pressure; GCS, Glasgow Coma Scale;  $\beta$ , Beta Coefficient; S.E, Standard Error; t, T-Statistic; P, P-Value; CI, Confidence Interval.*

Table S5 Potential risk variables for length of ICU stay before PSM

| Variables        | Univariate analysis |      |       |       |                         | Multivariate analysis |      |       |       |                        |
|------------------|---------------------|------|-------|-------|-------------------------|-----------------------|------|-------|-------|------------------------|
|                  | $\beta$             | S.E  | t     | P     | $\beta$ (95%CI)         | $\beta$               | S.E  | t     | P     | $\beta$ (95%CI)        |
| Group            |                     |      |       |       |                         |                       |      |       |       |                        |
| Single group     |                     |      |       |       | 0.00 (Reference)        |                       |      |       |       | 0.00 (Reference)       |
| Multiple group   | 5.48                | 1.61 | 3.40  | <.001 | 5.48 (2.32 ~ 8.65)      | 5.45                  | 1.57 | 3.47  | <.001 | 5.45 (2.37 ~ 8.52)     |
| Gender           |                     |      |       |       |                         |                       |      |       |       |                        |
| Female           |                     |      |       |       | 0.00 (Reference)        |                       |      |       |       | 0.00 (Reference)       |
| Male             | -4.89               | 1.78 | -2.75 | 0.006 | -4.89 (-8.38 ~ -1.40)   | -4.58                 | 1.74 | -2.63 | 0.009 | -4.58 (-8.00 ~ -1.16)  |
| HCT              | -19.58              | 9.47 | -2.07 | 0.039 | -19.58 (-38.13 ~ -1.03) | -6.58                 | 9.54 | -0.69 | 0.491 | -6.58 (-25.28 ~ 12.12) |
| Serum creatinine | 0.01                | 0.00 | 2.23  | 0.026 | 0.01 (0.01 ~ 0.02)      | 0.01                  | 0.01 | 0.86  | 0.391 | 0.01 (-0.01 ~ 0.02)    |
| Respiratory rate | 0.38                | 0.10 | 3.87  | <.001 | 0.38 (0.19 ~ 0.57)      | 0.22                  | 0.11 | 2.05  | 0.042 | 0.22 (0.01 ~ 0.42)     |
| Heart rate       | 0.08                | 0.02 | 4.08  | <.001 | 0.08 (0.04 ~ 0.12)      | 0.04                  | 0.02 | 1.79  | 0.074 | 0.04 (-0.00 ~ 0.08)    |
| MAP              | -0.07               | 0.03 | -2.80 | 0.005 | -0.07 (-0.12 ~ -0.02)   | -0.06                 | 0.03 | -2.43 | 0.016 | -0.06 (-0.11 ~ -0.01)  |
| APACHE II        | 0.45                | 0.13 | 3.50  | <.001 | 0.45 (0.20 ~ 0.70)      | 0.12                  | 0.14 | 0.85  | 0.395 | 0.12 (-0.16 ~ 0.40)    |
| Renal failure    |                     |      |       |       |                         |                       |      |       |       |                        |

| Variables | Univariate analysis |      |      |       |                     | Multivariate analysis |      |      |       |                     |
|-----------|---------------------|------|------|-------|---------------------|-----------------------|------|------|-------|---------------------|
|           | $\beta$             | S.E  | t    | P     | $\beta$ (95%CI)     | $\beta$               | S.E  | t    | P     | $\beta$ (95%CI)     |
| NO        |                     |      |      |       | 0.00 (Reference)    |                       |      |      |       | 0.00 (Reference)    |
| YES       | 6.98                | 3.19 | 2.19 | 0.029 | 6.98 (0.72 ~ 13.23) | 2.26                  | 3.63 | 0.62 | 0.533 | 2.26 (-4.85 ~ 9.38) |

*Abbreviations: HCT, Hematocrit; MAP, Mean Arterial Pressure; APACHE II, Acute Physiology and Chronic Health Evaluation II;  $\beta$ , Beta Coefficient; S.E, Standard Error; t, T-Statistic; P, P-Value; CI, Confidence Interval.*

Table S6 Potential risk variables for in-hospital mortality before PSM

| Variables      | Univariate analysis |      |       |       |                    | Multivariate analysis |      |       |       |                    |
|----------------|---------------------|------|-------|-------|--------------------|-----------------------|------|-------|-------|--------------------|
|                | $\beta$             | S.E  | Z     | P     | HR (95%CI)         | $\beta$               | S.E  | Z     | P     | HR (95%CI)         |
| Group          |                     |      |       |       |                    |                       |      |       |       |                    |
| Single group   |                     |      |       |       | 0.00 (Reference)   |                       |      |       |       | 0.00 (Reference)   |
| Multiple group | 0.14                | 0.28 | 0.51  | 0.613 | 1.15 (0.67 ~ 1.99) | 0.14                  | 0.28 | 0.51  | 0.607 | 1.16 (0.67 ~ 2.00) |
| GCS            | -0.11               | 0.04 | -2.97 | 0.003 | 0.90 (0.84 ~ 0.96) | -0.05                 | 0.04 | -1.21 | 0.227 | 0.95 (0.88 ~ 1.03) |
| APACHE II      | 0.08                | 0.02 | 3.95  | <.001 | 1.09 (1.04 ~ 1.13) | 0.07                  | 0.02 | 2.77  | 0.006 | 1.07 (1.02 ~ 1.12) |

*Abbreviations: GCS, Glasgow Coma Scale; APACHE II, Acute Physiology and Chronic Health Evaluation II;  $\beta$ , Beta Coefficient; S.E, Standard Error; Z, Z-Statistic; P, P-Value; HR, Hazard Ratio; CI, Confidence Interval.*

Table S7 Potential Risk Variables for 28-day mortality before PSM

| Variables      | Univariate analysis |      |       |       |                    | Multivariate analysis |      |       |       |                    |
|----------------|---------------------|------|-------|-------|--------------------|-----------------------|------|-------|-------|--------------------|
|                | $\beta$             | S.E  | Z     | P     | HR (95%CI)         | $\beta$               | S.E  | Z     | P     | HR (95%CI)         |
| Group          |                     |      |       |       |                    |                       |      |       |       |                    |
| Single group   |                     |      |       |       | 0.00 (Reference)   |                       |      |       |       | 0.00 (Reference)   |
| Multiple group | 0.28                | 0.32 | 0.89  | 0.374 | 1.33 (0.71 ~ 2.47) | 0.23                  | 0.32 | 0.73  | 0.463 | 1.26 (0.68 ~ 2.35) |
| Heart rate     | 0.01                | 0.00 | 2.07  | 0.039 | 1.01 (1.01 ~ 1.02) | 0.01                  | 0.00 | 1.35  | 0.178 | 1.01 (1.00 ~ 1.01) |
| GCS            | -0.10               | 0.04 | -2.48 | 0.013 | 0.90 (0.83 ~ 0.98) | -0.06                 | 0.05 | -1.31 | 0.189 | 0.94 (0.86 ~ 1.03) |
| APACHEII       | 0.08                | 0.02 | 3.22  | 0.001 | 1.08 (1.03 ~ 1.13) | 0.05                  | 0.03 | 1.48  | 0.138 | 1.05 (0.99 ~ 1.11) |

*Abbreviations: GCS, Glasgow Coma Scale; APACHE II, Acute Physiology and Chronic Health Evaluation II;  $\beta$ , Beta Coefficient; S.E, Standard Error; Z, Z-Statistic; P, P-Value; HR, Hazard Ratio; CI, Confidence Interval.*

Table S8 Baseline characteristics between groups after PSM

| Variables                                | Single group<br>(n = 149) | Multiple group<br>(n = 149) | <i>P</i> value | SMD    |
|------------------------------------------|---------------------------|-----------------------------|----------------|--------|
| pre-ICU LOS                              | 0.00 (0.00, 2.00)         | 0.00 (0.00, 1.00)           | 0.097          | -0.020 |
| APACHE II                                | 20.00 (16.00, 24.00)      | 20.00 (17.00, 24.00)        | 0.444          | 0.095  |
| Age                                      | 58.00 (48.00, 70.00)      | 58.00 (50.00, 69.00)        | 0.910          | 0.022  |
| GCS                                      | 8.00 (5.00, 12.00)        | 8.00 (5.00, 13.00)          | 0.896          | -0.006 |
| Body temperature                         | 37.70 (36.70, 38.30)      | 37.60 (36.80, 38.40)        | 0.939          | 0.000  |
| MAP                                      | 76.00 (63.00, 116.00)     | 72.00 (61.00, 116.00)       | 0.764          | 0.006  |
| Heart rate                               | 106.00 (59.00, 132.00)    | 113.00 (60.00, 131.00)      | 0.899          | 0.063  |
| Respiratory rate                         | 25.00 (16.00, 29.00)      | 25.00 (16.00, 30.00)        | 0.624          | 0.049  |
| PaO <sub>2</sub> /FiO <sub>2</sub> ratio | 252.50 (202.00, 357.58)   | 250.00 (193.33, 352.50)     | 0.996          | 0.024  |
| PH                                       | 7.40 (7.32, 7.49)         | 7.40 (7.31, 7.47)           | 0.475          | -0.018 |
| Serum sodium                             | 137.00 (134.20, 141.60)   | 137.00 (134.00, 142.00)     | 0.870          | 0.041  |

| Variables            | Single group<br>(n = 149) | Multiple group<br>(n = 149) | P value | SMD    |
|----------------------|---------------------------|-----------------------------|---------|--------|
| Serum potassium      | 3.80 (3.40, 4.40)         | 3.80 (3.40, 4.42)           | 0.819   | 0.006  |
| Serum creatinine     | 66.00 (49.00, 116.00)     | 70.00 (50.00, 110.00)       | 0.622   | -0.003 |
| HCT                  | 0.32 (0.26, 0.37)         | 0.31 (0.25, 0.38)           | 0.591   | -0.076 |
| WBC                  | 3.80 (3.40, 4.40)         | 3.80 (3.40, 4.42)           | 0.819   | 0.006  |
| Diabetes, n (%)      | 23 (15.44)                | 24 (16.11)                  | 0.874   | 0.018  |
| COPD, n (%)          | 10 (6.71)                 | 10 (6.71)                   | 1.000   | 0.000  |
| Hypertension, n (%)  | 61 (40.94)                | 59 (39.60)                  | 0.813   | -0.027 |
| Heart disease, n (%) | 11 (7.38)                 | 11 (7.38)                   | 1.000   | 0.000  |
| Renal failure, n (%) | 11 (7.38)                 | 10 (6.71)                   | 0.821   | -0.027 |
| Gender, male, n (%)  | 107 (71.81)               | 102 (68.46)                 | 0.527   | -0.072 |
| CHS, n (%)           | 13 (8.72)                 | 11 (7.38)                   | 0.670   | -0.051 |

*Abbreviations: APACHE II, Acute Physiology and Chronic Health Evaluation II; GCS, Glasgow Coma Scale; MAP, Mean Arterial Pressure; PaO<sub>2</sub>, Partial Pressure of Oxygen; PH, Potential of Hydrogen; HCT, Hematocrit; WBC, White Blood Cell Count; COPD, Chronic Obstructive Pulmonary Disease; CHS, Chronic Health Score.*

Table S9 Potential risk variables for mechanical ventilation duration after PSM

| Variables           | Univariate analysis |       |       |       |                           | Multivariate analysis |       |       |       |                          |
|---------------------|---------------------|-------|-------|-------|---------------------------|-----------------------|-------|-------|-------|--------------------------|
|                     | $\beta$             | S.E   | t     | P     | $\beta$ (95%CI)           | $\beta$               | S.E   | t     | P     | $\beta$ (95%CI)          |
| Group               |                     |       |       |       |                           |                       |       |       |       |                          |
| Single group        |                     |       |       |       | 0.00 (Reference)          |                       |       |       |       | 0.00 (Reference)         |
| Multiple group      | 130.34              | 35.19 | 3.70  | <.001 | 130.34 (61.36 ~ 199.31)   | 121.98                | 34.13 | 3.57  | <.001 | 121.98 (55.08 ~ 188.88)  |
| Gender, male, n (%) | -96.20              | 38.93 | -2.47 | 0.014 | -96.20 (-172.50 ~ -19.90) | -83.38                | 37.50 | -2.22 | 0.027 | -83.38 (-156.89 ~ -9.87) |
| Respiratory rate    | 6.47                | 2.13  | 3.03  | 0.003 | 6.47 (2.29 ~ 10.64)       | 3.99                  | 2.31  | 1.73  | 0.085 | 3.99 (-0.53 ~ 8.51)      |
| MAP                 | -1.25               | 0.55  | -2.26 | 0.025 | -1.25 (-2.33 ~ -0.16)     | -0.93                 | 0.54  | -1.73 | 0.084 | -0.93 (-1.98 ~ 0.12)     |
| APACHEII            | 8.39                | 2.88  | 2.91  | 0.004 | 8.39 (2.74 ~ 14.03)       | 4.31                  | 2.93  | 1.47  | 0.143 | 4.31 (-1.44 ~ 10.06)     |
| Heart rate          | 1.44                | 0.46  | 3.16  | 0.002 | 1.44 (0.55 ~ 2.34)        | 0.67                  | 0.50  | 1.33  | 0.184 | 0.67 (-0.32 ~ 1.66)      |

*Abbreviations: MAP, Mean Arterial Pressure; APACHE II, Acute Physiology and Chronic Health Evaluation II;  $\beta$ , Beta Coefficient; S.E, Standard Error; t, T-Statistic; P, P-Value; CI, Confidence Interval.*

Table S10 Potential risk variables for length of ICU stay after PSM

| Variables        | Univariate analysis |       |       |       |                         | Multivariate analysis |       |       |       |                         |
|------------------|---------------------|-------|-------|-------|-------------------------|-----------------------|-------|-------|-------|-------------------------|
|                  | $\beta$             | S.E   | t     | P     | $\beta$ (95%CI)         | $\beta$               | S.E   | t     | P     | $\beta$ (95%CI)         |
| Group            |                     |       |       |       |                         |                       |       |       |       |                         |
| Single group     |                     |       |       |       | 0.00 (Reference)        |                       |       |       |       | 0.00 (Reference)        |
| Multiple group   | 6.15                | 1.80  | 3.42  | <.001 | 6.15 (2.62 ~ 9.67)      | 5.71                  | 1.71  | 3.33  | <.001 | 5.71 (2.35 ~ 9.07)      |
| COPD             | 8.81                | 3.63  | 2.43  | 0.016 | 8.81 (1.70 ~ 15.92)     | 4.50                  | 3.54  | 1.27  | 0.204 | 4.50 (-2.43 ~ 11.44)    |
| Renal failure    | 8.87                | 3.54  | 2.50  | 0.013 | 8.87 (1.93 ~ 15.82)     | 5.29                  | 3.46  | 1.53  | 0.128 | 5.29 (-1.50 ~ 12.07)    |
| Gender           | -4.91               | 1.98  | -2.48 | 0.014 | -4.91 (-8.80 ~ -1.03)   | -3.77                 | 1.91  | -1.98 | 0.049 | -3.77 (-7.52 ~ -0.03)   |
| Respiratory rate | 0.40                | 0.11  | 3.74  | <.001 | 0.40 (0.19 ~ 0.61)      | 0.23                  | 0.12  | 1.91  | 0.057 | 0.23 (-0.01 ~ 0.46)     |
| Heart rate       | 0.08                | 0.02  | 3.63  | <.001 | 0.08 (0.04 ~ 0.13)      | 0.04                  | 0.03  | 1.41  | 0.158 | 0.04 (-0.01 ~ 0.09)     |
| HCT              | -27.07              | 10.68 | -2.53 | 0.012 | -27.07 (-48.00 ~ -6.13) | -10.75                | 10.60 | -1.01 | 0.311 | -10.75 (-31.53 ~ 10.03) |
| MAP              | -0.07               | 0.03  | -2.63 | 0.009 | -0.07 (-0.13 ~ -0.02)   | -0.05                 | 0.03  | -1.69 | 0.092 | -0.05 (-0.10 ~ 0.01)    |
| APACHE II        | 0.49                | 0.15  | 3.37  | <.001 | 0.49 (0.21 ~ 0.78)      | 0.18                  | 0.15  | 1.19  | 0.236 | 0.18 (-0.12 ~ 0.48)     |

Abbreviations: COPD, Chronic Obstructive Pulmonary Disease; HCT, Hematocrit; MAP, Mean Arterial Pressure; APACHE II, Acute Physiology and Chronic Health Evaluation II;  $\beta$ , Beta Coefficient; S.E, Standard Error; t, T-Statistic; P, P-Value; CI, Confidence Interval.

Table S11 Potential risk variables for length of hospital stay after PSM

| Variables      | Univariate analysis |       |       |       |                          | Multivariate analysis |       |       |       |                         |
|----------------|---------------------|-------|-------|-------|--------------------------|-----------------------|-------|-------|-------|-------------------------|
|                | $\beta$             | S.E   | t     | P     | $\beta$ (95%CI)          | $\beta$               | S.E   | t     | P     | $\beta$ (95%CI)         |
| Group          |                     |       |       |       |                          |                       |       |       |       |                         |
| Single group   |                     |       |       |       | 0.00 (Reference)         |                       |       |       |       | 0.00 (Reference)        |
| Multiple group | 5.50                | 3.21  | 1.71  | 0.088 | 5.50 (-0.80 ~ 11.80)     | 5.25                  | 2.91  | 1.80  | 0.073 | 5.25 (-0.46 ~ 10.97)    |
| PH             | -40.85              | 11.81 | -3.46 | <.001 | -40.85 (-63.99 ~ -17.71) | -32.20                | 11.37 | -2.83 | 0.005 | -32.20 (-54.49 ~ -9.91) |
| Heart rate     | 0.10                | 0.04  | 2.37  | 0.018 | 0.10 (0.02 ~ 0.18)       | 0.05                  | 0.04  | 1.30  | 0.195 | 0.05 (-0.03 ~ 0.13)     |
| MAP            | -0.14               | 0.05  | -2.92 | 0.004 | -0.14 (-0.24 ~ -0.05)    | -0.09                 | 0.05  | -1.91 | 0.057 | -0.09 (-0.18 ~ 0.00)    |
| GCS            | 1.23                | 0.38  | 3.19  | 0.002 | 1.23 (0.47 ~ 1.98)       | 0.73                  | 0.36  | 2.03  | 0.044 | 0.73 (0.02 ~ 1.43)      |
| HCT            | -63.07              | 18.67 | -3.38 | <.001 | -63.07 (-99.66 ~ -26.48) | -39.07                | 17.98 | -2.17 | 0.031 | -39.07 (-74.31 ~ -3.82) |

*Abbreviations: PH, Potential of Hydrogen; MAP, Mean Arterial Pressure; GCS, Glasgow Coma Scale; HCT, Hematocrit;  $\beta$ , Beta Coefficient; S.E, Standard Error; t, T-Statistic; P, P-Value; CI, Confidence Interval.*

Table S12 Potential risk variables for in-hospital mortality after PSM

| Variables      | Univariate analysis |      |       |       |                    | Multivariate analysis |      |       |       |                    |
|----------------|---------------------|------|-------|-------|--------------------|-----------------------|------|-------|-------|--------------------|
|                | $\beta$             | S.E  | Z     | P     | HR (95%CI)         | $\beta$               | S.E  | Z     | P     | HR (95%CI)         |
| Group          |                     |      |       |       |                    |                       |      |       |       |                    |
| Single group   |                     |      |       |       | 0.00 (Reference)   |                       |      |       |       | 0.00 (Reference)   |
| Multiple group | 0.05                | 0.33 | 0.16  | 0.873 | 1.05 (0.55 ~ 2.01) | 0.03                  | 0.33 | 0.09  | 0.931 | 1.03 (0.54 ~ 1.97) |
| GCS            | -0.11               | 0.04 | -2.48 | 0.013 | 0.90 (0.83 ~ 0.98) | -0.04                 | 0.05 | -0.87 | 0.384 | 0.96 (0.87 ~ 1.05) |
| APACHE II      | 0.08                | 0.02 | 3.17  | 0.002 | 1.08 (1.03 ~ 1.13) | 0.08                  | 0.03 | 2.67  | 0.007 | 1.08 (1.02 ~ 1.14) |
| MAP            | 0.01                | 0.00 | 2.62  | 0.009 | 1.01 (1.01 ~ 1.02) | 0.01                  | 0.00 | 3.14  | 0.002 | 1.01 (1.01 ~ 1.02) |

*Abbreviations: GCS, Glasgow Coma Scale; APACHE II, Acute Physiology and Chronic Health Evaluation II; MAP, Mean Arterial Pressure;  $\beta$ , Beta Coefficient; S.E, Standard Error; Z, Z-Statistic; P, P-Value; HR, Hazard Ratio; CI, Confidence Interval.*

Table S13 Potential Risk Variables for 28-day mortality after PSM

| Variables      | Univariate analysis |      |       |       |                    | Multivariate analysis |      |       |       |                    |
|----------------|---------------------|------|-------|-------|--------------------|-----------------------|------|-------|-------|--------------------|
|                | $\beta$             | S.E  | Z     | P     | HR (95%CI)         | $\beta$               | S.E  | Z     | P     | HR (95%CI)         |
| Group          |                     |      |       |       |                    |                       |      |       |       |                    |
| Single group   |                     |      |       |       | 0.00 (Reference)   |                       |      |       |       | 0.00 (Reference)   |
| Multiple group | 0.27                | 0.38 | 0.71  | 0.479 | 1.31 (0.62 ~ 2.77) | 0.25                  | 0.38 | 0.67  | 0.506 | 1.29 (0.61 ~ 2.73) |
| GCS            | -0.10               | 0.05 | -2.00 | 0.046 | 0.90 (0.82 ~ 0.99) | -0.06                 | 0.06 | -1.05 | 0.293 | 0.94 (0.84 ~ 1.05) |
| APACHE II      | 0.07                | 0.03 | 2.30  | 0.022 | 1.07 (1.01 ~ 1.13) | 0.05                  | 0.03 | 1.40  | 0.161 | 1.05 (0.98 ~ 1.12) |

*Abbreviations: GCS, Glasgow Coma Scale; APACHE II, Acute Physiology and Chronic Health Evaluation II;  $\beta$ , Beta Coefficient; S.E, Standard Error; Z, Z-Statistic; P, P-Value; HR, Hazard Ratio; CI, Confidence Interval.*

Table S14 Potential risk variables for hospitalization costs before PSM ( $\times 10^3$  yuan)

| Variables        | Univariate analysis |        |           |       |                                | Multivariate analysis |        |           |       |                               |
|------------------|---------------------|--------|-----------|-------|--------------------------------|-----------------------|--------|-----------|-------|-------------------------------|
|                  | $\beta$             | S.E    | t         | P     | $\beta$ (95%CI)                | $\beta$               | S.E    | t         | P     | $\beta$ (95%CI)               |
| Group            |                     |        |           |       |                                |                       |        |           |       |                               |
| Single group     |                     |        |           |       | 0.00 (Reference)               |                       |        |           |       | 0.00 (Reference)              |
| Multiple group   | 45.30               | 18.57  | 2.44      | 0.015 | 45.30 (8.89 ~ 81.70)           | 46.40                 | 18.04  | 2.57      | 0.011 | 46.40 (11.05 ~ 81.75)         |
| CHS              | 72.03               | 32.09  | 2.24      | 0.025 | 72.03 (9.14 ~ 134.92)          | 20.19                 | 35.75  | 0.56      | 0.573 | 20.19 (-49.88 ~ 90.26)        |
| pre-ICU LOS      | 4.88                | 1.25   | 3.90      | <.001 | 4.88 (2.43 ~ 7.33)             | 4.62                  | 1.22   | 3.78      | <.001 | 4.62 (2.22 ~ 7.02)            |
| HCT              | -<br>251.86         | 107.94 | -<br>2.33 | 0.020 | -251.86 (-463.43 ~ -<br>40.30) | -<br>108.65           | 110.22 | -<br>0.99 | 0.325 | -108.65 (-324.68 ~<br>107.38) |
| Serum creatinine | 0.14                | 0.06   | 2.51      | 0.012 | 0.14 (0.03 ~ 0.25)             | 0.07                  | 0.07   | 1.03      | 0.304 | 0.07 (-0.06 ~ 0.19)           |
| Respiratory rate | 2.46                | 1.13   | 2.19      | 0.029 | 2.46 (0.26 ~ 4.67)             | 0.42                  | 1.22   | 0.34      | 0.732 | 0.42 (-1.98 ~ 2.81)           |
| Heart rate       | 0.76                | 0.24   | 3.24      | 0.001 | 0.76 (0.30 ~ 1.22)             | 0.45                  | 0.26   | 1.70      | 0.091 | 0.45 (-0.07 ~ 0.96)           |
| PH               | -<br>160.87         | 68.72  | -<br>2.34 | 0.020 | -160.87 (-295.56 ~ -<br>26.18) | -56.39                | 71.71  | -<br>0.79 | 0.432 | -56.39 (-196.95 ~ 84.16)      |
| MAP              | -0.87               | 0.29   | -<br>3.02 | 0.003 | -0.87 (-1.43 ~ -0.30)          | -0.73                 | 0.29   | -<br>2.50 | 0.013 | -0.73 (-1.30 ~ -0.16)         |
| APACHE II        | 4.63                | 1.47   | 3.14      | 0.002 | 4.63 (1.74 ~ 7.51)             | 1.41                  | 1.64   | 0.86      | 0.392 | 1.41 (-1.81 ~ 4.63)           |

*Abbreviations: CHS, Chronic Health Score; HCT, Hematocrit; PH, Potential of Hydrogen; MAP, Mean Arterial Pressure; APACHE II, Acute Physiology and Chronic Health Evaluation II;  $\beta$ , Beta Coefficient; S.E, Standard Error; t, T-Statistic; P, P-Value; CI, Confidence Interval.*

Table S15 Potential risk variables for hospitalization costs after PSM ( $\times 10^3$  yuan)

| Variables        | Univariate analysis |        |       |       |                            | Multivariate analysis |        |       |       |                            |
|------------------|---------------------|--------|-------|-------|----------------------------|-----------------------|--------|-------|-------|----------------------------|
|                  | $\beta$             | S.E    | t     | P     | $\beta$ (95%CI)            | $\beta$               | S.E    | t     | P     | $\beta$ (95%CI)            |
| Group            |                     |        |       |       |                            |                       |        |       |       |                            |
| Single group     |                     |        |       |       | 0.00 (Reference)           |                       |        |       |       | 0.00 (Reference)           |
| Multiple group   | 56.79               | 19.62  | 2.89  | 0.004 | 56.79 (18.34 ~ 95.24)      | 53.54                 | 18.35  | 2.92  | 0.004 | 53.54 (17.58 ~ 89.50)      |
| pre-ICU LOS      | 4.98                | 1.23   | 4.05  | <.001 | 4.98 (2.57 ~ 7.39)         | 4.69                  | 1.18   | 3.99  | <.001 | 4.69 (2.39 ~ 6.99)         |
| PH               | 2.55                | 1.19   | 2.15  | 0.032 | 2.55 (0.23 ~ 4.88)         | 1.61                  | 1.27   | 1.27  | 0.206 | 1.61 (-0.88 ~ 4.09)        |
| Respiratory rate | 2.55                | 1.19   | 2.15  | 0.032 | 2.55 (0.23 ~ 4.88)         | 1.61                  | 1.27   | 1.27  | 0.206 | 1.61 (-0.88 ~ 4.09)        |
| Heart rate       | 0.68                | 0.25   | 2.67  | 0.008 | 0.68 (0.18 ~ 1.18)         | 0.36                  | 0.27   | 1.30  | 0.193 | 0.36 (-0.18 ~ 0.90)        |
| MAP              | -0.84               | 0.30   | -2.78 | 0.006 | -0.84 (-1.44 ~ -0.25)      | -0.51                 | 0.30   | -1.74 | 0.083 | -0.51 (-1.10 ~ 0.07)       |
| Body temperature | -23.09              | 9.08   | -2.54 | 0.011 | -23.09 (-40.88 ~ -5.29)    | -26.87                | 8.84   | -3.04 | 0.003 | -26.87 (-44.21 ~ -9.54)    |
| APACHE II        | 4.93                | 1.59   | 3.10  | 0.002 | 4.93 (1.81 ~ 8.04)         | 2.90                  | 1.62   | 1.79  | 0.074 | 2.90 (-0.27 ~ 6.07)        |
| HCT              | -313.72             | 115.73 | -2.71 | 0.007 | -313.72 (-540.54 ~ -86.90) | -111.08               | 115.19 | -0.96 | 0.336 | -111.08 (-336.85 ~ 114.70) |

*Abbreviations: PH, Potential of Hydrogen; MAP, Mean Arterial Pressure; APACHE II, Acute Physiology and Chronic Health Evaluation II; HCT, Hematocrit;  $\beta$ , Beta Coefficient; S.E, Standard Error; t, T-Statistic; P, P-Value; CI, Confidence Interval.*

Figure S1 Standardized mean difference (SMD) of variables before and after propensity score matching.

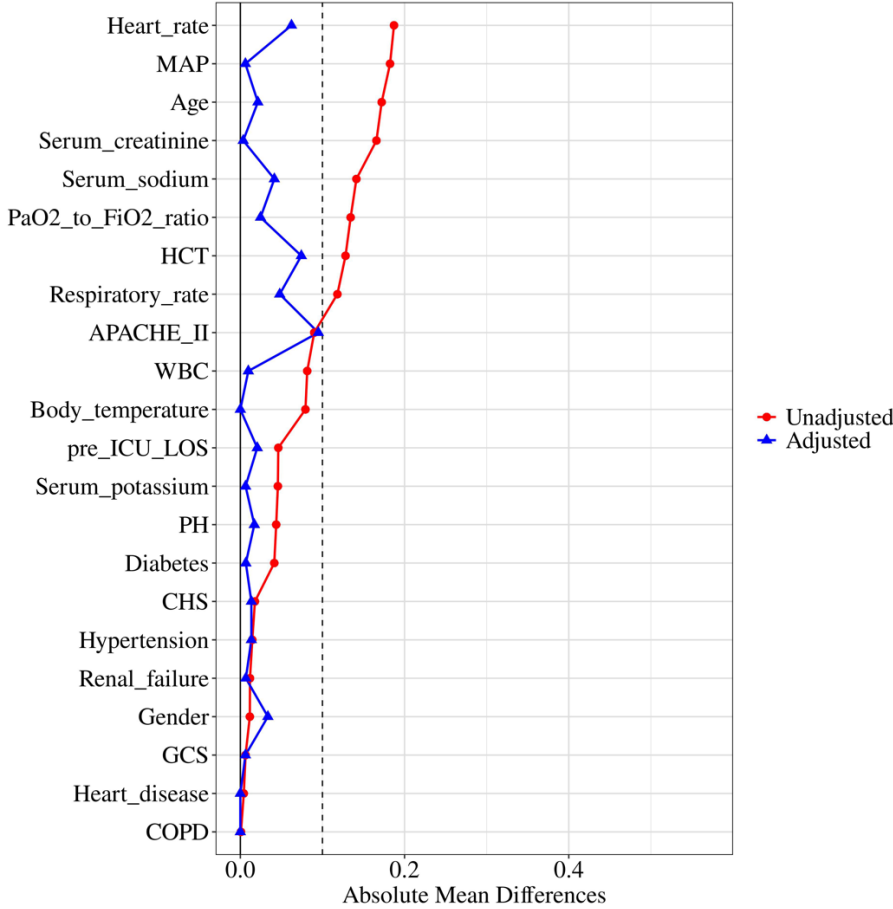

Figure S2 Probability density distribution map of variables before and after propensity score matching.

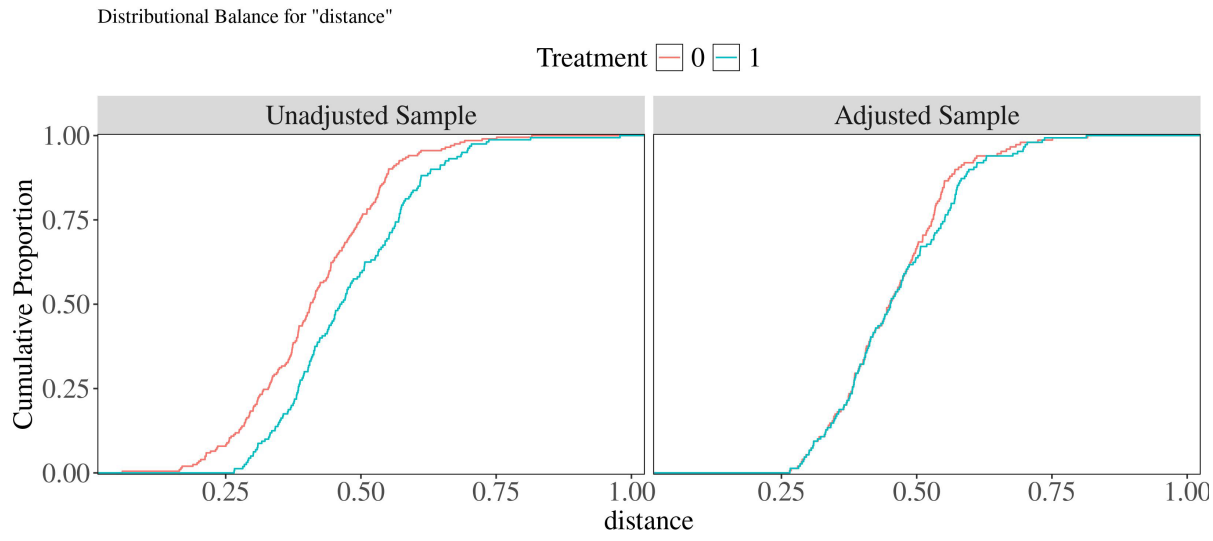

Supplement: Supplementary file 1 [file 567559_Supplementary_Material.pdf]
